# Supplementary material
Source: HighWire-hosted journal article supplement (https://www.annfammed.org/highwire/filestream/8075/field_highwire_adjunct_files/0/Goldberg-SuppApp.pdf)
Supplement: Goldberg-SuppApp.pdf [file Goldberg-SuppApp.pdf]

Goldberg DG, Kuzel AJ. Elements of the patient-centered medical home in family practices in Virginia. *Ann Fam Med*. 2009;7(4):301-308.

<http://www.annfammed.org/cgi/content/full/7/4/301/DC1>

Supplemental Appendix

V i r g i n i a C o m m o n w e a l t h U n i v e r s i t y

VCU Family Medicine Practice Survey

**START HERE:** Indicate name of physician practice: \_\_\_\_\_

**Team-Based Care**

1. Does your practice use any of the following ancillary care providers? Check all that apply.

- Nurses (LPN/RN)
- Nurse practitioners
- Physician assistants
- Patient education
- Mental health specialist
- Medical assistant
- None of the above

**Patient Registries**

2. Does your practice maintain a registry or list of patients with the following conditions? Check all that apply.

- Asthma
- Congestive heart failure
- Depression
- Diabetes
- Coronary artery disease
- Other: \_\_\_\_\_
- None of the above

**Patient Self-Management**

3. Does your practice offer programs or services to increase patient self-management skills for the following conditions (beyond physician counseling during usual office visits)? Check all that apply.

- Asthma
- Congestive heart failure
- Depression
- Diabetes
- Coronary artery disease
- Other: \_\_\_\_\_
- None of the above

**Alternative Scheduling Arrangements**

4. Indicate whether your practice provides the following patient care options. Check all that apply.
- Scheduled evening or weekend visits
  - On-call evening or weekend visits
  - Group visits (more than one patient receiving patient education, guidance, etc, at the same time and place)
  - Telephone consultations
  - E-mail consultation
  - Rapid access (same day appointments for urgent and nonurgent conditions)

**Clinical Guidelines**

5. Does your practice use nationally recognized evidence-based guidelines to care for patients? Check one.
- Yes, we utilize guidelines for numerous diseases
  - Yes, we utilize guidelines for one to three diseases
  - No, we rely on our professional training
  - No, the available guidelines don't suit our patient population (If No, then move to question 7)
6. Are the physicians in your practice trained (continuing education, in-house, formal education) on the use of these guidelines? Check one.
- Yes, on numerous guidelines
  - Yes, on some of the guidelines
  - No, not at this time
  - Don't know

**Patient Satisfaction Surveys**

7. Does your practice administer patient satisfaction surveys? Check one.
- Yes, we have administered a patient satisfaction survey within the last year
  - Yes, we have administered a patient satisfaction survey within the last two years
  - Not yet, but we intend to do so in the future
  - No, we don't plan to administer a patient satisfaction survey (If No, then move to question 9)
8. Does your practice initiate change based on the results of patient satisfaction surveys? Check one.
- Yes, after each survey
  - Yes, after some surveys
  - Not yet
  - Don't know

**Information Systems**

9. Does your practice use an electronic medical record for patients?
- Yes
  - No (If No, then move to question 11)

## Online Supplementary Data

<http://www.annfammed.org/cgi/content/full/7/4/301/DC1>

10. Which of the following pieces of information are included on your individual patient's electronic medical record? Check all that apply.

- A patient problem list (inventory of all patient problems/conditions)
- Ambulatory visit data (encounters)
- Emergency room visits
- Services provided by other specialists
- Inpatient stays
- Medications
- Radiology findings
- Problem specific clinical guidelines
- Medication ordering reminders and/or drug interaction information
- Laboratory findings

### **Continuity of Care**

11. Does your practice have specific processes to ensure continuity of care (in-person, phone, and/or e-mail) so that most of the time patients receive care from their personal physician? Check one.

- We utilize formal processes for continuity of care
- We utilize informal processes for continuity of care
- Not currently, but we plan to develop processes in the future
- Not at this time

### **Comprehensive Care**

12. Does your practice provide care to the following patients? Check all that apply.

- Adults
- Children
- Infants
- Males
- Females
- All of these

13. Does your practice provide the following types of care? Check all that apply.

- Preventive care
- Acute care
- Rehabilitative care
- Chronic illness care
- Mental health care
- Prenatal care
- Obstetrics
- Gynecology

### **Community Linkages**

14. What types of relationships does your practice have with community service organizations (eg, senior centers, support groups, health department) for your chronically ill patients? Check one.

- Written agreements
- Informal agreements
- We don't have formal relationships with community service organizations

**Office Space**

15. Has your practice evaluated your office space to consider whether the facility(s) are functional to meet patient needs and expectations? Check one.

- Yes, evaluation by outside organization
- Yes, evaluation by internal staff
- No, but we plan to review our office space in the future
- No, a review is not needed for our facility
- No, we have not reviewed our office space

16. Does your office space accommodate the following? Check all that apply.

- Group visits (more than one patient receiving patient education, etc, at the same time and place)
- Patient library and/or computer work stations for patient education
- Special needs patients (eg, physical disability, psychological disorder)
- None of these at this time

**Translation Services**

17. Do you have non-English speaking patients?

- Yes
- No (If No, then move to question 19)

18. Does your practice have provisions for linguistic services (staff member, translation service, etc) for the non-English speaking population in your service area? Check one.

- We utilize internal staff for translation
- We utilize an outside translation service
- We utilize both internal staff and a translation service
- We don't have enough non-English speaking patients to justify this service
- We don't offer translation service at this time

**Performance Measurement and Monitoring**

19. Does your practice measure and monitor the following kinds of patient care data? Check all that apply.

- Clinician use of evidence-based guidelines
- Results of clinical quality improvement projects
- Outcome data for selected conditions
- None of these at this time

20. Does your group provide written feedback reports or data to physicians and practice teams regarding their clinical performance? Check one.

- Yes, at least once per month
- Yes, at least once per year
- We plan to in the future
- No, it is not practical for our practice

21. Does someone in your practice review the practice's financial performance? Check one.

- Yes, at least once per month
- Yes, at least once per year
- We plan to in the future
- No, it is not practical for our practice

**Patient and Employee Services**

22. Does your practice offer services or products to patients that are not covered by insurance plans or health programs (vitamins, cosmetic, etc)?

- Yes
- No

23. Does your practice offer any of the following diagnostic testing? Check all that apply.

- Bone mineral density testing
- Colposcopy
- Pulmonary function
- Stress tests
- Hearing tests
- None at this time

24. Do you have any programs or services that focus on improving employee morale and/or teamwork?

- Yes
- No

**Market Assessment**

25. Which of the following trends in the community and/or state does your practice review? Check all that apply.

- Community/regional disease patterns
- Regulatory actions
- Competition (family medicine or other primary care services)
- Resource availability (staffing, medical supplies/equipment, specialist care)
- Demand for services
- Patient demographics (geographic location, age, sex, ethnic background)
- None at this time

**External Organizations**

**Indicate your agreement with the following statements**

26. The Medicare rules and regulations have made it almost impossible to practice in this environment.

- Strongly agree
- Somewhat agree
- Neither agree nor disagree
- Somewhat disagree
- Strongly disagree

27. Some aspects of the Medicare rules and regulations have actually made it easier to practice.

- Strongly agree
- Somewhat agree
- Neither agree nor disagree
- Somewhat disagree
- Strongly disagree

## Online Supplementary Data

<http://www.annfammed.org/cgi/content/full/7/4/301/DC1>

28. The rules and requirements set forth by Medicare are changing so fast it is difficult to keep up with them.

- Strongly agree
- Somewhat agree
- Neither agree nor disagree
- Somewhat disagree
- Strongly disagree

29. The physicians in our practice have deep knowledge of the rules and requirements from Medicare.

- Strongly agree
- Somewhat agree
- Neither agree nor disagree
- Somewhat disagree
- Strongly disagree

30. Managed care organizations' rules and regulations have made it almost impossible to practice in this environment.

- Strongly agree
- Somewhat agree
- Neither agree nor disagree
- Somewhat disagree
- Strongly disagree

31. Some aspects of managed care organizations' rules and regulations have actually made it easier to practice.

- Strongly agree
- Somewhat agree
- Neither agree nor disagree
- Somewhat disagree
- Strongly disagree

32. The rules and requirements set forth by managed care organizations are changing so fast it is difficult to keep up with them.

- Strongly agree
- Somewhat agree
- Neither agree nor disagree
- Somewhat disagree
- Strongly disagree

33. The physicians in our practice have deep knowledge of the rules and requirements from managed care organizations.

- Strongly agree
- Somewhat agree
- Neither agree nor disagree
- Somewhat disagree
- Strongly disagree

## Online Supplementary Data

<http://www.annfammed.org/cgi/content/full/7/4/301/DC1>

34. We have changed our practice as a result of interactions with professional associations (American Medical Association, Virginia Academy of Family Physicians, etc).

- Strongly agree
- Somewhat agree
- Neither agree nor disagree
- Somewhat disagree
- Strongly disagree

35. We have changed our practice as a result of expectations or demands from groups that represent patient concerns (eg, AARP, American Cancer Society).

- Strongly agree
- Somewhat agree
- Neither agree nor disagree
- Somewhat disagree
- Strongly disagree

36. We have changed our practice as a result of expectations or demands from patients.

- Strongly agree
- Somewhat agree
- Neither agree nor disagree
- Somewhat disagree
- Strongly disagree

37. Our practice actively looks for information on best practices from other offices, hospitals, or organizations.

- Strongly agree
- Somewhat agree
- Neither agree nor disagree
- Somewhat disagree
- Strongly disagree

### **Organizational Characteristics**

38. What is your practice type?

Check one.

- Single specialty
- Multispecialty with primary care only
- Multispecialty with primary care and specialty care

Check one.

- Private practice
- Non-profit clinic federally or state funded
- Non-profit clinic privately funded
- Academic/teaching clinic
- Urgent Care Center

39. At the present time, what is the total number of physicians in your medical practice (regardless of full-time or part-time status)?

\_\_\_\_\_ Number

## Online Supplementary Data

---

<http://www.annfammed.org/cgi/content/full/7/4/301/DC1>

40. How many full-time equivalent (FTE) physicians and physician extenders work in your office?  
(For example, two full-time physicians and one 90% physician would total 2.9 FTE)

\_\_\_\_\_ Physician FTE      \_\_\_\_\_ Physician Extender FTE

41. Is your practice owned (full or partial) by an outside entity? Check one.

- Yes, full or partial ownership by a health plan
- Yes, full or partial ownership by a hospital
- Yes, by other
- No

42. Does your practice have contractual relationships with another practice, university, hospital, or health care system (excluding managed care organizations and insurance companies)?

- We have written agreement(s) to provide services for a stipulated fee
- We have other types of written agreement(s) with health care organization(s)
- We have no contractual relationships with other health care organizations

43. How long has the practice been in existence in its current location?

\_\_\_\_\_ Number of years

44. Position of respondent (eg, staff physician, medical director, office administrator):

\_\_\_\_\_

45. Address of physician practice:

\_\_\_\_\_

\_\_\_\_\_
